# Supplementary material for: Carbon isotopes in the ocean model of the Community Earth System Model (CESM1)
Source: Copernicus journal article supplement (doi:10.5194/gmd-8-2419-2015), 2015-08-05
Supplement: Supplementary file [file gmd-8-2419-2015-supplement-title-page.pdf › gmd-8-2419-2015-supplement-title-page.pdf]

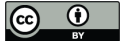

## *Supplement of*

# **Carbon isotopes in the ocean model of the Community Earth System Model (CESM1)**

**A. Jahn et al.**

*Correspondence to:* A. Jahn (alexandra.jahn@colorado.edu)

- gmd-8-2419-2015-supplement-title-page.pdf
- Carbon\_Isotope\_code\_cesm\_1.0.5
  - .DS\_Store
  - README
  - abio\_dic\_dic14\_mod.F90
  - ecosys\_Ciso\_mod.F90
  - ecosys\_driver.F90
  - ecosys\_fields.F90
  - ecosys\_mod.F90
  - ecosys\_parms.F90
  - ocn.Ciso.setup.csh
  - ocn.abio\_dic\_dic14.setup.csh
  - ocn.ecosys.setup.csh
  - passive\_tracers.F90
  - tavg.F90
- \_\_MACOSX
  - Carbon\_Isotope\_code\_cesm\_1.0.5
    - \* .\_DS\_Store
    - \* .\_README
    - \* .\_abio\_dic\_dic14\_mod.F90
    - \* .\_ecosys\_Ciso\_mod.F90
    - \* .\_ecosys\_driver.F90
    - \* .\_ecosys\_fields.F90
    - \* .\_ocn.Ciso.setup.csh
    - \* .\_ocn.abio\_dic\_dic14.setup.csh

The copyright of individual parts of the supplement might differ from the CC-BY 3.0 licence.
